# Supplementary material for: How to chew gum: the post-ingestion fate of foliar secondary compounds consumed by a eucalypt herbivore
Source: Springer Nature journal article supplement (doi:10.1007/s00049-024-00409-2), 2024-07-18
Supplement: MOESM1 [file 49_2024_409_MOESM1_ESM.docx]

**How to chew gum: the post-ingestion fate of foliar secondary compounds consumed by a eucalypt herbivore**

**Supplementary file 1**: Work-flow diagram and Correction factor calculation

Correction factor calculation

Step 1. Area correction factor per sample (CpS), for each retention time

, where:

AEc = Area, concentrated extract, and

AEo = Area, original extract

Step 2. Plot of mean correction for each retention time


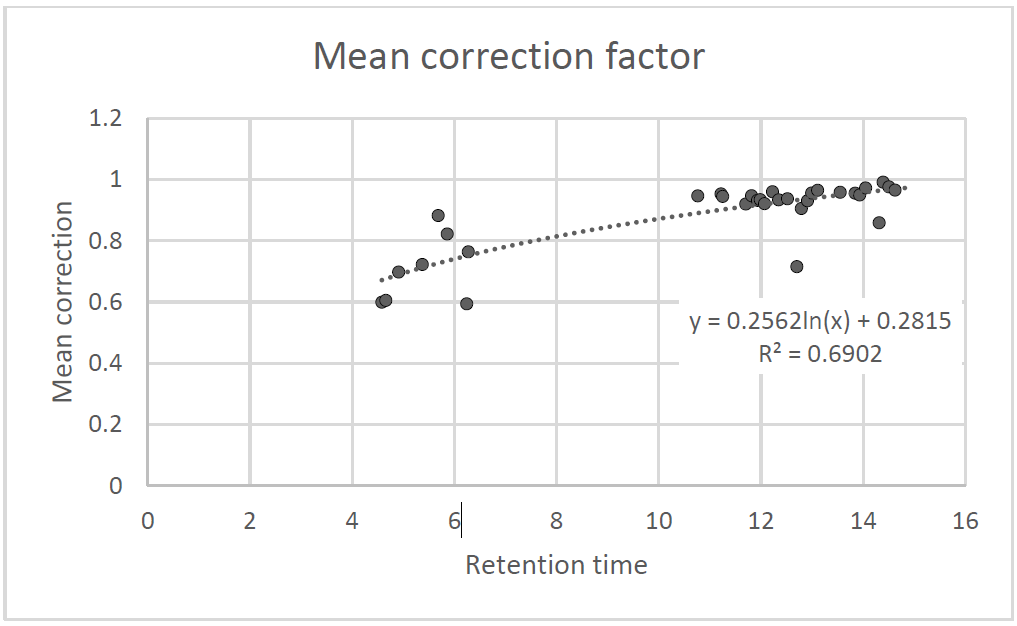


Step 3. Calculate adjusted correction factor for each retention time and apply to each area:

where:

CA = corrected area, and

RT = retention time
