# Supplementary material for: How to chew gum: the post-ingestion fate of foliar secondary compounds consumed by a eucalypt herbivore
Source: Springer Nature journal article supplement (doi:10.1007/s00049-024-00409-2), 2024-07-18
Supplement: MOESM2 [file 49_2024_409_MOESM2_ESM.docx]

**How to chew gum: the post-ingestion fate of foliar secondary compounds consumed by a eucalypt herbivore**

**Supplementary file 2**

Retention time (RT), Kovats retention index (KI), Identification, Method of identification (Method), reference for Kovats retention index (Reference KI), and identification status (ID status) of compounds identified in this study.

| **RT** | **KI** | **Identification** | **Methoda** | **Reference KI** | | **ID status** |
| --- | --- | --- | --- | --- | --- | --- |
| 4.66 | 934 | α-pinene | MS, KI | 939 | Adams, 2007 | confident |
| 5.37 | 977 | β-pinene | MS, KI | 979 | Adams, 2007 | confident |
| 5.68 | 996 | β-myrcene | MS, KI | 988 | Adams, 2007 | tentative |
| 5.86 | 1007 | α-phellandrene | MS, KI | 1002 | Adams, 2007 | confident |
| 6.27 | 1033 | 1,8-cineole | MS, KI | 1031 | Adams, 2007 | confident |
| 9.31 | 1236 | 2α-hydroxy-1,8-cineole | MS, KI | 1229 | Branco et al., 2020 | confident |
| 9.68 | 1263 | 7-hydroxy-1,8-cineole | MS, KI | 1258 | Branco et al., 2020 | confident |
| 12.07 | 1447 | aromadendrene | MS, KI | 1441 | Adams, 2007 | confident |
| 12.22 | 1459 | β-vatirenene isomer | MS | - | - | tentative |
| 12.51 | 1483 | β-vatirenene isomer | MS | - | - | tentative |
| 12.68 | 1496 | eremophilene | MS | - | - | tentative |
| 12.79 | 1505 | bicyclogermacrene | MS, KI | 1500 | Adams, 2007 | tentative |
| 12.99 | 1523 | τ-cadinene | MS, KI | 1512 | Adams, 2007 | confident |
| 13.11 | 1533 | δ-cadinene | MS, KI | 1523 | Adams, 2007 | confident |
| 13.55 | 1571 | epiglobulol | MS, KI | 1585 | Babushok et al., 2011 | confident |
| 13.68 | 1583 | β-copaen-4-α-ol | MS, KI | 1590 | Adams, 2007 | tentative |
| 13.84 | 1597 | globulol | MS, KI | 1584 | NIST, 2005 | confident |
| 13.93 | 1605 | viridiflorol | MS, KI | 1592 | Adams, 2007 | tentative |
| 14.62 | 1668 | α-cadinol | MS, KI | 1652 | Adams, 2007 | tentative |
| 16.24 | 1822 | hexadecanal | MS, KI | 1817 | NIST, 2005 | confident |
| 17.09 | 1908 | 2-heptadecanone | MS, KI | 1901 | NIST, 2005 | tentative |
| 18.96 | 2111 | 2-nonadecanone | MS, KI | 2106 | NIST, 2005 | tentative |
| 19.08 | 2124 | phytol | MS, KI | 2112-2135 | NIST, 2005 | tentative |
| 21.20 | 2377 | dodecanoic acid, decyl ester - |  | - | - | confident |
| 21.86 | 2461 | x-methyltetracosane - C25H52 |  | - | - | tentative |
| 22.14 | 2498 | pentacosane | MS, KI | 2500 | NIST, 2005 | tentative |
| 22.89 | 2599 | hexacosane | MS, KI | 2600 | Adams, 2007 | confident |
| 23.33 | 2662 | x-methylhexacosane C27H56 | MS, KI | 2663 | NIST, 2005 | tentative |
| 23.60 | 2699 | n-heptacosane | MS, KI | 2700 | Adams, 2007 | confident |
| 24.13 | 2775 | hexadecanoic acid, decyl ester |  | - | - | confident |
| 26.58 | 3155 | α-tocopherol | MS | - | - | tentative |
| 27.15 | 3249 | 1,30-triacontanediol | MS | - | - | tentative |
| 27.74 | 3345 | β-sitosterol | MS | - | - | tentative |
| 27.98 | 3385 | hentriacontane-14,16-dione | MS, m/z 100 | - | - | tentative |
| 29.30 | 3602 | tritriacontane-16,18-dione | MS, m/z 100 | - | - | tentative |
| 31.03 | 3803 | pentatriacontane-16,18-dione | MS, m/z 100 | - | - | tentative |

a MS: mass spectrum, KI: Kovats retention index, m/z: diagnostic ion

Adams RP (2007) Identification of essential oil components by gas chromatography/mass spectrometry. Allured Publishing Corporation, Illinois.

Babushok V, Linstrom P, Zenkevich I (2011) Retention indices for frequently reported compounds of plant essential oils. J. Phys. Chem. Ref. Data, 40**,** 043101-043147.

Branco S, Mateus EP, Gomes da Silva MDR, Mendes D, Pereira MMA, Schütz S, Paiva MR (2020) Identification of pheromone candidates for the eucalyptus weevil, *Gonipterus platensis* (Coleoptera, Curculionidae). J. Appl. Entomol. 144: 41-53.

NIST 2005. NIST Mass Spectral Search Program 2.0.
