# Supplementary material for: How to chew gum: the post-ingestion fate of foliar secondary compounds consumed by a eucalypt herbivore
Source: Springer Nature journal article supplement (doi:10.1007/s00049-024-00409-2), 2024-07-18
Supplement: MOESM3 [file 49_2024_409_MOESM3_ESM.docx]

**How to chew gum: the post-ingestion fate of foliar secondary compounds consumed by a eucalypt herbivore**

**Supplementary file 3**

Retention time (RT), Kovats retention index (KI), Identification, putative formula (Formula), Ion fragmentation and identification status (ID status) of undetermined compounds.

| **RT** | **KI** | **Compound identification** | **Formula** | **Ion fragmentation** | **ID status** |
| --- | --- | --- | --- | --- | --- |
| 12.47 | 1480 | sesquiterpene A | C15H24 | 155 (100), 43(90), 93(27), 109(24), 84(24), 95(20), 71(20), 124(19), 82(17), 81(14) | tentative |
| 14.05 | 1616 | sesquiterpene hydrate A | C15H26O | 149(100), 81(42), 51(40), 93(33), 164(33), 122(32), 10(31), 121(31), 109(30), 107(29) | tentative |
| 26.27 | 3104 | flavonoid derivative A |  | 313(100), 312(54), 283(20), 314(195), 282(14), 281(8), 142(7), 297(6), 294(6), 135(6) | tentative |
| 28.59 | 3485 | aliphatic β-diketone A | C32H62O2 | 100(100), 57(51), 43(44), 71(37), 85(33), 55(27), 69(25), 239(23), 83(21), 97(21) | tentative |
| 29.77 | 3656 | aliphatic β-diketone B | C33H64O2 | 100(100), 43(44), 57(44), 71(39), 85(30), 240(29), 281(24), 279(24), 97(23), 55(23) | tentative |
| 28.80 | 3520 | benzylester A |  | 104(100), 105(33), 43(5, 57(5), 91(5), 108(3), 55(3), 71(3), 106(3), 69(2) | tentative |
| 30.40 | 3731 | benzylester B |  | 104(100), 105(34), 43(4), 55(3), 71(3), 57(3), 106(3), 91(3), 73(2), 69(2) | tentative |
| 30.08 | 3694 | unsaturated aliphatic β-diketone A |  | 100(100), 57(44), 43(42), 71(36), 85(28), 239(26), 279(22), 55(22), 97(21), 69(20) | tentative |
| 31.28 | 3824 | unsaturated aliphatic β-diketone B |  | 100(100), 57(61), 43(60), 55(57), 71(57), 97(51), 69(42), 281(39), 85(38), 83(35) | tentative |
| 14.27 | 1636 | undetermined A |  | 149(100), 59(65), 164(52), 107(48), 135(38), 93(33), 108(33), 81(32), 94(27), 91(96) | unknown |
| 16.05 | 1803 | undetermined B |  | 93(100), 92(57), 136(40), 91(21), 77(16), 94(9), 134(5), 41(5), 43(5), 137(43) | unknown |
| 16.45 | 1843 | undetermined C |  | 93(100), 92(53), 136(37), 68(27), 95(22), 91(21), 57(20), 43(17), 123(16), 41(16) | unknown |
| 21.02 | 2355 | undetermined D |  | 43(100), 96(99), 138(97), 55(68), 84(67), 97(63), 57(63), 41(62), 69(62), 180(58) | unknown |
| 24.50 | 2830 | undetermined E |  | 330(100), 195(93), 93(33), 331(23), 251(23), 136(19), 204(15), 91(15), 193(12), 69(11) | unknown |
| 24.57 | 2840 | undetermined F |  | 330(100), 195(90), 93(27), 251(24), 331(22), 204(18), 136(18), 91(13), 387(11), 69(12) | unknown |
| 24.79 | 2873 | undetermined G |  | 330(100), 195(94), 93(35), 251(23), 331(22), 136(18), 204(18), 91(15), 69(12), 193(12) | unknown |
| 25.46 | 2974 | undetermined H |  | 69(100), 285(94), 85(93), 71(91), 73(83), 281(75), 41(69), 96(68), 57(64), 147(62) | unknown |
| 25.66 | 3004 | undetermined I |  | 91(100), 108(99), 92(27), 104(19), 43(17), 294(13), 105(11), 109(10), 312(10), 69(9) | unknown |
| 26.88 | 3204 | undetermined J |  | 149(100), 355(52), 135(42), 150(39), 161(35), 131(25), 148(20), 122(19), 203(18), 128(14) | unknown |
| 26.94 | 3214 | undetermined K |  | 91(100), 108(96), 104(84), 105(30), 92(29), 43(25), 57(25), 71(16), 55(15), 109(12) | unknown |
| 27.57 | 3318 | undetermined L |  | 104(100), 105(33), 91(7), 57(71), 43(7), 108(6), 55(4), 71(31), 106(3), 69(3) | unknown |
| 28.15 | 3413 | undetermined M |  | 108(100), 91(99), 92(29), 57(23), 43(19), 350(155), 71(15), 55(13), 85(11), 109(11) | unknown |
| 28.40 | 3455 | undetermined N |  | 352(100), 95(56), 281(40), 57(38), 43(37), 239(31), 55(29), 113(28), 71(25), 353(24) | unknown |
| 28.94 | 3543 | undetermined O |  | 265(100), 97(27), 55(25), 43(23), 267(22), 57(22), 281(18), 71(18), 83(15), 69(15) | unknown |
| 29.55 | 3631 | undetermined P |  | 91(100), 108(98), 104(44), 92(30), 105(19), 57(18), 43(170, 378(17), 71(14), 377(11) | unknown |
| 31.39 | 3834 | undetermined Q |  | 108(100), 91(96), 92(25), 104(18), 43(16), 71(16), 57(16), 406(15), 55(14), 405(11) | unknown |
| 31.60 | 3851 | undetermined R |  | 120(100), 121(34), 95(3), 147(3), 122(3), 41(2), 43(2), 68(2), 194(2), 81(2) | unknown |
