# Supplementary material for: How to chew gum: the post-ingestion fate of foliar secondary compounds consumed by a eucalypt herbivore
Source: Springer Nature journal article supplement (doi:10.1007/s00049-024-00409-2), 2024-07-18
Supplement: MOESM4 [file 49_2024_409_MOESM4_ESM.docx]

**How to chew gum: the post-ingestion fate of foliar secondary compounds consumed by a eucalypt herbivore**

**Supplementary file 4**


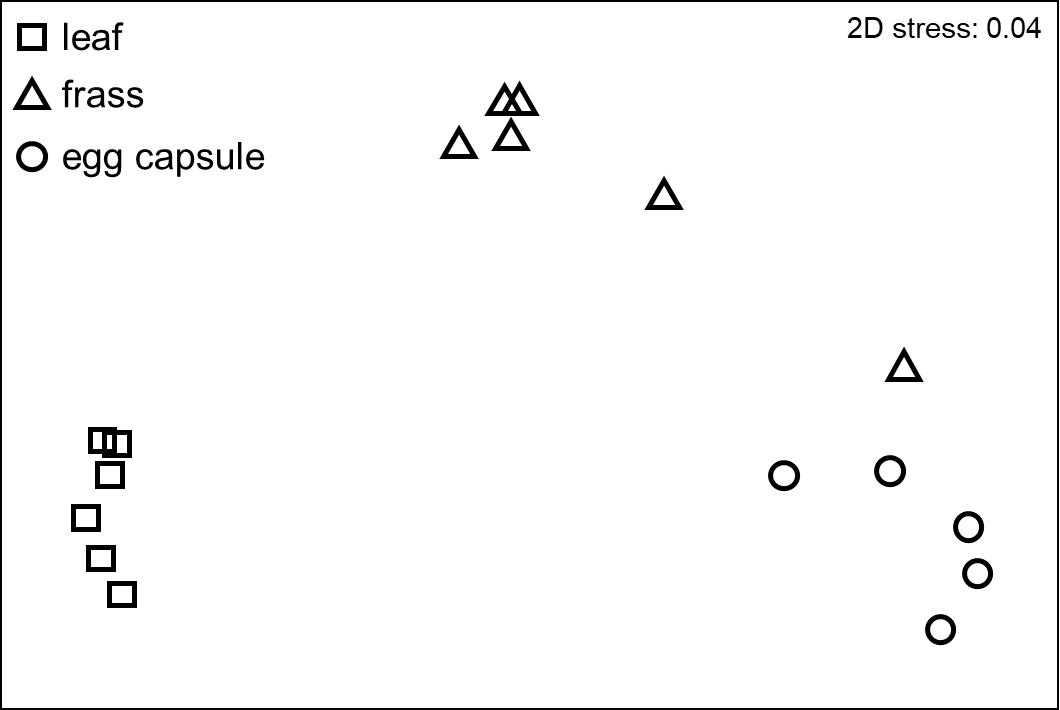


Non-metric multidimensional scaling (nMDS) ordination based on Bray-Curtis clustering of fourth-root transformed data according to sample of *Gonipterus* sp. n. 2 frass, egg capsules and damaged *E. globulus* leaves
